# Supplementary material
Source: PubMed Central journal article supplement (PMC8595900)
Supplement: mmc1.pdf [file mmc1.pdf]

**Biophysical Journal, Volume 120**

**Supplemental information**

**Roles of key residues and lipid dynamics reveal pHLIP-membrane interactions at intermediate pH**

**Sarah A. Otieno and Wei Qiang**

## Supporting Information

Roles of Key Proline/Arginine Residues and Changes in Lipid Dynamics Reveal Interactions between the pH-Low Insertion Peptide (pHLIP) and Model Bilayers at Intermediate pH Values

S. Otieno, and W. Qiang

*Quantitative Analysis of <sup>31</sup>P Relaxation Spectroscopy.* Quantitative analysis to the <sup>31</sup>P relaxation spectroscopy was conducted to obtain the correlation times of fast- and slow-motion at nanosecond and microsecond timescales, respectively. The analysis algorithm was derived based on previous literature methods<sup>1,2</sup> with approximations made for the current sample.

To start, the <sup>31</sup>P resonance peaks in T<sub>1</sub> or T<sub>2</sub> spectra were integrated over a 0.5 ppm range (approximately the full width at half maximum of the peak). The normalized peak volumes were plotted as a function of delay times and fitted to exponential functions for T<sub>1</sub> or T<sub>2</sub> relaxation to obtain the decay time constants τ<sub>1</sub> or τ<sub>2</sub>, respectively:

$$I(t) = I_0 \exp(-t/\tau_2) \text{ for } T_2 \text{ (1)}$$

$$I(t) = I_0 - 2I_0 \exp(-t/\tau_1) \text{ for } T_1 \text{ (2)}$$

The rate constant for the T<sub>1</sub> and T<sub>2</sub> decay, denoted as R<sub>1</sub> and R<sub>2</sub> respectively:

$$R_1 = 1/\tau_1 \text{ (3)}$$

$$R_2 = 1/\tau_2 \text{ (4)}$$

The fast and slow-motion correlation times, denoted τ<sub>f</sub> and τ<sub>s</sub> respectively, are related to the relaxation decay rate constants according to the following quadratic equations from literature:

$$R_1 = \frac{2}{15} \omega_{31P}^2 \sigma^2 \left(1 + \frac{\eta^2}{3}\right) \left[ \frac{S^2 \tau_s}{1 + (\omega_{31P} \tau_s)^2} + \frac{(1-S^2) \tau_f}{1 + (\omega_{31P} \tau_f)^2} \right] \text{ (5)}$$

$$R_2 = \frac{1}{15} \omega_{31P}^2 \sigma^2 \left(1 + \frac{\eta^2}{3}\right) \left\{ \left[ \frac{S^2 \tau_s}{1 + (\omega_{31P} \tau_s)^2} + \frac{(1-S^2) \tau_f}{1 + (\omega_{31P} \tau_f)^2} \right] + \frac{4}{3} [S^2 \tau_s + (1-S^2) \tau_f] \right\} \text{ (6)}$$

In the present work, approximation was made based on the magnitude of the terms in these equations to simplify the calculation. We consider the orders of magnitude of  $\tau_s$  ( $\sim 10^{-9}$ ),  $\tau_f$  ( $\sim 10^{-6}$ ) and the values of constants in Eqs. 5-6, where  $\omega_{31P}$ ,  $\sigma$ ,  $\eta$  were the spectrometer frequency, the CSA and the asymmetric parameter of  $^{31}\text{P}$  respectively, and had the values  $2\pi \times 242 \text{ MHz}$ , 160 ppm and 0.57. The order parameters  $S$  was estimated as 0.2 based on our previous studies using similar lipid bilayer models<sup>3</sup>. The first terms in both  $R_1$  and  $R_2$  are neglectable because they are  $\sim 10^{-15}$  while all other terms are between  $10^{-8}$  and  $10^{-10}$ . Furthermore,  $(\omega_{31P}\tau_f)^2$  is  $\sim 4-10$  considering the average value of  $\tau_f$  for non-pHLIP and pHLIP-containing samples and constant  $\omega_{31P}$ , and is considerably larger than 1. Therefore, the second terms in both  $R_1$  and  $R_2$  are estimated as  $\frac{2}{15}\sigma^2\left(1+\frac{\eta^2}{3}\right)(1-S^2)\tau_f^{-1}$  and  $\frac{1}{15}\sigma^2\left(1+\frac{\eta^2}{3}\right)(1-S^2)\tau_f^{-1}$  respectively. Eqs. 5-6 are therefore estimated as:

$$R_1 = \frac{2}{15}\sigma^2\left(1+\frac{\eta^2}{3}\right)(1-S^2)\tau_f^{-1} \quad (7)$$

$$R_2 = \frac{1}{15}\sigma^2\left(1+\frac{\eta^2}{3}\right)(1-S^2)\tau_f^{-1} + \frac{4}{45}\omega_{31P}^2\sigma^2\left(1+\frac{\eta^2}{3}\right)[S^2\tau_s + (1-S^2)\tau_f] \quad (8)$$

The values of  $\tau_s$  and  $\tau_f$  are calculated based on Eqs. 7-8 and plotted in the main text for different pH values.

The uncertainties of  $\tau_s$  and  $\tau_f$  are derived from the error propagation of Eqs. 7-8:

$$\sigma_{\tau_f} = \frac{C1}{\omega_{31P}^2} \sigma_{T_1} \quad (9)$$

$$\sigma_{\tau_s} = \sqrt{\left(\frac{-C2}{T_2^2}\right)^2 \sigma_{T_2}^2 + \left(\frac{C3}{T_1^2} - C4\right)^2 \sigma_{T_1}^2} \quad (10)$$

, where C1-C4 are constants derived from the  $^{31}\text{P}$  Larmor frequency, the CSA, the asymmetry parameter and the order parameters, and their values are  $8.74 \times 10^9$ ,  $4.29 \times 10^{-9}$ ,  $2.20 \times 10^{-9}$  and  $9.58 \times 10^{-8}$ , respectively.

*Natural Abundance Correction for  $^{13}\text{C}$ - $^{15}\text{N}$  REDOR applied to T19-P20.* The overall  $^{13}\text{C}$ ' signal contains three parts: the isotope labeled Proline  $^{13}\text{C}$ ', the natural abundance contribution from other unlabeled amino acids on pHLIP; the natural abundance contribution from lipids ester groups (2 ester carbonyl carbons on each lipid molecule, POPC). Considerations: (1) the molar ratio between pHLIP and lipids for all samples was set to be 1:75; (2) the polarization transfer efficiency are different for pHLIP and lipid molecules on NMR because they may have different dynamics.

Overall  $S_0$  signal:

$$S_0 = S_{0,lipid-na} + S_{0,pHLIP-na} + S_{0,Pro} \quad (11)$$

, where  $S_{0,pHLIP-na} = 36 \times 0.011 S_{0,Pro}$  (Natural abundance of  $^{13}\text{C}$ , 0.011; 36 other natural abundant carbons),  $S_{0,lipid-na} = 75 \times 2 \times 0.011 \times f S_{0,Pro}$  (Natural abundance of  $^{13}\text{C}$ , 0.011; 75-fold lipid molecules with 2 carbonyl carbons each,  $f$  describes the coefficient due to different polarization transfer between peptides and lipids)

Overall  $S_1$  signal:

$$S_1 = S_{1,lipid-na} + S_{1,pHLIP-na} + S_{1,Pro} \quad (12)$$

, where  $S_{1,pHLIP-na} = 35 \times 0.011 S_{0,Pro}$  (Assuming one natural abundance carbonyl carbon was completely suppressed because of the  $^{13}\text{C}$ - $^{15}\text{N}$  dipolar coupling, which is T19 C'),  $S_{1,lipid-na} = S_{0,pHLIP-na}$  (Assuming no lipid carbonyl carbons are close to the T19 NH, likely to be true at least for pH 6.1, 5.8 and 5.3)

Therefore,

$$\left(\frac{\Delta S}{S_0}\right)^{exp} = \frac{1}{(150f+36) \times 0.011 + 1} \left(\frac{\Delta S}{S_0}\right)^{corr} + \frac{0.011}{(150f+36) \times 0.011 + 1} \quad (13)$$

$$\left(\frac{\Delta S}{S_0}\right)^{corr} = [(150f + 36) \times 0.011 + 1] \left(\frac{\Delta S}{S_0}\right)^{exp} - 0.011 \quad (14)$$

Use pH 5.3 experimental data to find out the best-fit  $f$  (because it is known that Proline adopts “Trans” configuration in the *State III*<sup>4</sup>). It is determined that  $f = 0.16$ . Use this best-fit parameter to perform natural abundance corrections for the other pH values. Corrected values are plotted as open symbols in Figure 5 in main text.

### Reference:

1. Yang, Y., Yao, H. & Hong, M. Distinguishing bicontinuous lipid cubic phases from isotropic membrane morphologies using (31)P solid-state NMR spectroscopy. *J. Phys. Chem. B* **119**, 4993-5001 (2015).
2. Chang, S.-L. & Tjandra, N. Temperature dependence of protein backbone motion from carbonyl <sup>13</sup>C and amide <sup>15</sup>N NMR relaxation. *J. Magn. Reson.* **174**, 43-53 (2005).
3. Qiang, W., Doherty, K. E., Klees, L. M. & Tobin-Miyaji, Y. Time-Dependent Lipid Dynamics, Organization and Peptide-Lipid Interaction in Phospholipid Bilayers with Incorporated  $\beta$ -Amyloid Oligomers. *J. Phys. Chem. Lett.* **11**, 8329-8336 (2020).
4. Hanz, S. Z. *et al.* Protonation-Driven Membrane Insertion of a pH-Low Insertion Peptide. *Angew. Chemie. Int. Ed.* **55**, 12564-12569 (2016).
